# Supplementary material for: Studying turn performance, trunk control, and mobility in acute stroke subjects: a cross-sectional study
Source: PeerJ. 2024 Dec 3;12:e18501. doi: 10.7717/peerj.18501 (PMC11623126; doi:10.7717/peerj.18501)
Supplement: Supplemental Information 2 [file peerj-12-18501-s002.xlsx]

## Sheet: Sheet1
sno	Age	Gender	Post stroke duration in days	Affected side	Dominant side	Group	Grp	Lesion area	STREAM	TIS	turn(seconds)	turn(steps)
1	58	F	5	left	right	1	NTD	hemipons infarct	59	19	3	5
2	48	F	8	right	right	1		hemipons infarct	63	21	3	5
3	70	M	3	right	right	1		subcortical infarct	65	22	3	5
4	45	F	3	right	right	1		hemipons infarct	62	22	2	3
5	53	M	7	left	right	1		cortical infarct	60	19	3	5
6	65	F	6	right	right	1		hemipons infarct	65	21	2	3
7	65	F	3	right	right	1		subcortical infarct	63	21	3	5
8	56	M	5	right	right	1		hemipons infarct	62	21	3	5
9	58	M	5	right	right	1		subcortical infarct	63	22	2	3
10	62	F	4	left	right	1		subcortical infarct	60	20	3	5
11	73	M	3	left	right	1		subcortical infarct	65	21	3	5
12	59	F	8	left	right	1		midline pons infarct	63	21	3	5
13	51	F	8	right	right	1		subcortical infarct	60	21	3	5
14	65	F	3	right	right	1		hemipons infarct	60	20	3	5
15	71	M	4	left	right	1		subcortical infarct	63	22	3	5
16	45	F	4	left	right	1		subcortical infarct	65	22	3	5
17	68	M	5	right	right	1		subcortical infarct	60	20	3	5
18	71	M	3	left	right	1		subcortical infarct	62	22	3	5
19	73	M	5	right	right	1		subcortical infarct	62	20	3	5
20	43	F	5	right	right	1		cortical infarct	57	17	3	5
21	70	M	5	left	right	1		subcortical infarct	62	21	3	5
22	48	F	7	right	right	1		hemipons infarct	54	19	3	5
23	58	M	8	left	right	1		hemipons infarct	63	21	3	5
24	65	F	4	left	right	1		subcortical infarct	63	22	3	5
25	67	M	4	right	right	1		subcortical infarct	65	22	3	5
26	70	M	5	right	right	1		subcortical infarct	63	19	3	4
27	54	F	3	left	right	1		hemipons infarct	62	22	3	4
28	56	M	7	right	right	1		hemipons infarct	60	20	3	5
29	58	F	6	left	right	1		subcortical infarct	65	21	3	5
30	53	M	3	left	right	1		subcortical infarct	63	21	2	4
31	55	M	5	right	right	1		subcortical infarct	60	22	2	3
32	60	F	7	left	right	1		subcortical infarct	63	21	3	4
33	45	F	3	left	right	1		hemipons infarct	62	21	3	5
34	58	F	9	left	right	2	TD	subcortical infarct	55	18	4	6
35	72	F	5	right	right	2		cortical infarct	60	13	7	13
36	82	F	5	right	right	2		subcortical infarct	61	19	6	12
37	76	F	7	left	right	2		hemipons infarct	57	13	5	10
38	67	F	5	right	right	2		subcortical infarct	57	17	5	10
39	78	F	7	left	right	2		cortical infarct	58	18	5	9
40	82	F	7	right	right	2		hemipons infarct	54	20	5	10
41	60	M	8	left	right	2		cortical infarct	63	21	4	8
42	73	F	3	right	right	2		cortical infarct	65	22	4	7
43	83	F	3	right	right	2		subcortical infarct	55	18	6	11
44	63	M	7	right	right	2		subcortical infarct	60	19	4	7
45	50	M	5	right	right	2		subcortical infarct	60	13	4	8
46	60	M	6	right	right	2		subcortical infarct	65	21	4	7
47	62	F	3	right	right	2		subcortical infarct	63	21	3	6
48	65	F	7	right	right	2		subcortical infarct	57	13	4	8
49	45	F	5	right	right	2		hemipons infarct	63	22	4	6
50	53	F	4	right	right	2		subcortical infarct	60	20	4	6
51	81	F	7	right	right	2		subcortical infarct	58	18	6	13
52	74	M	3	left	right	2		subcortical infarct	65	21	7	13
53	60	F	8	right	right	2		hemipons infarct	60	21	4	9
54	67	F	3	left	right	2		subcortical infarct	58	19	5	10
55	75	M	8	right	right	2		subcortical infarct	57	21	4	9
56	59	M	3	right	right	2		subcortical infarct	55	19	6	10
57	58	M	9	left	right	2		subcortical infarct	63	18	4	7
58	49	M	5	left	right	2		subcortical infarct	58	13	3	6
59	53	F	5	right	right	2		subcortical infarct	54	17	7	13
60	80	F	7	right	right	2		subcortical infarct	60	13	6	13
61	68	M	5	right	right	2		subcortical bleed	61	20	5	10
62	50	F	5	right	right	2		subcortical infarct	59	19	6	10
63	63	M	4	left	right	2		subcortical infarct	59	20	3	6
